# Supplementary material for: Probing conformational landscapes of binding and allostery in the SARS-CoV-2 omicron variant complexes using microsecond atomistic simulations and perturbation-based profiling approaches: hidden role of omicron mutations as modulators of allosteric signaling and epistatic relationships
Source: Royal Society of Chemistry journal article supplement (doi:10.1039/d3cp02042h), 2023-01-01
Supplement: d3cp02042h1.pdf [file d3cp02042h1.pdf]

## Supplementary Material

Probing Conformational Landscapes of Binding and Allostery in the SARS-CoV-2  
Omicron Variant Complexes Using Microsecond Atomistic Simulations and  
Perturbation-Based Profiling Approaches: Hidden Role of Omicron Mutations as  
Modulators of Allosteric Signaling and Epistatic Relationships

Gennady Verkhivker,<sup>1,2,3\*</sup> Mohammed Alshahrani,<sup>1</sup> Grace Gupta,<sup>1</sup> Sian Xiao,<sup>4</sup> Peng Tao<sup>4</sup>

<sup>1</sup> Keck Center for Science and Engineering, Schmid College of Science and Technology,  
Chapman University, Orange, CA 92866, United States of America; alshahrani@chapman.edu  
(M.A.); grgupta@chapman.edu (G.G.)

<sup>2</sup> Department of Biomedical and Pharmaceutical Sciences, Chapman University School of  
Pharmacy, Irvine, CA 92618, United States of America; verkhivk@chapman.edu (G.V.)

<sup>3</sup>Department of Pharmacology, Skaggs School of Pharmacy and Pharmaceutical Sciences,  
University of California San Diego, 9500 Gilman Drive, La Jolla, CA 92093, United States of  
America

<sup>4</sup>Department of Chemistry, Center for Research Computing, Center for Drug Discovery, Design,  
and Delivery (CD4), Southern Methodist University, Dallas, Texas, 75275, United States of  
America; sxiao@smu.edu (S.X.); ptao@smu.edu (P.T.)

\* Correspondence: verkhivk@chapman.edu; Tel.: +1-714-516-4586 (G.V)

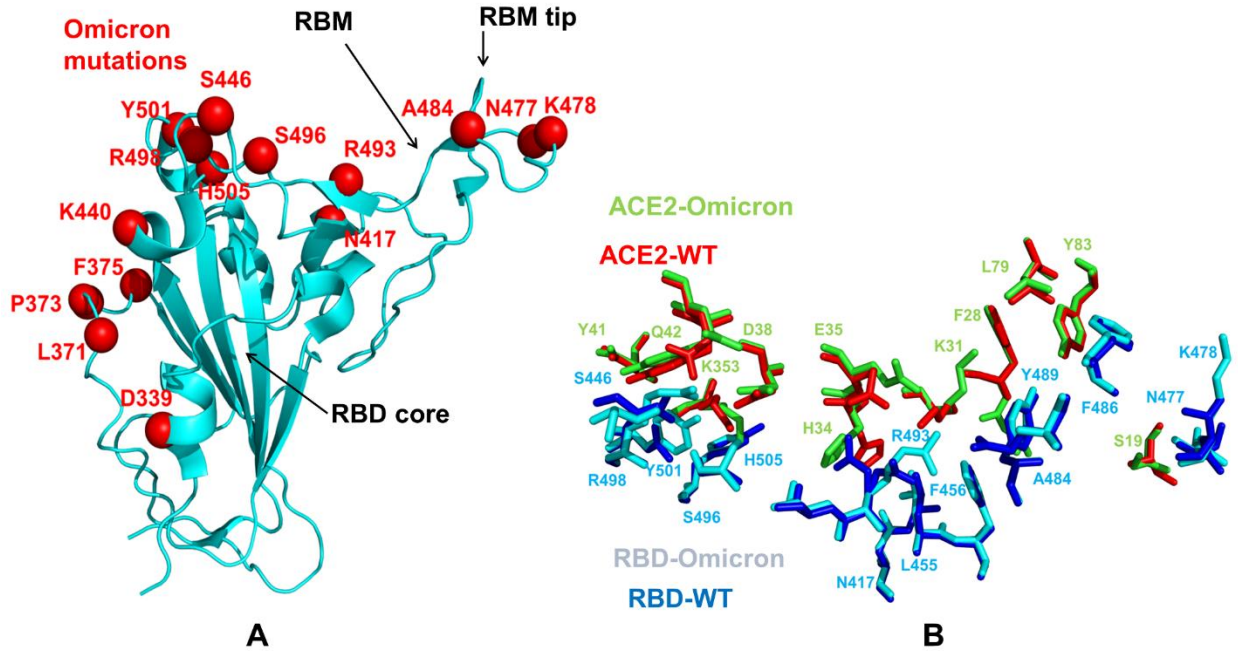

**Figure S1.** The SARS-CoV-2 RBD structure and binding interface residues in the RBD-ACE2 complexes. (A) The structure of the S-RBD (in ribbons) with Omicron mutations shown in red spheres. The RBD core region, the RBM region and the RBM tip motif are indicated by arrows. (B) Superposition of the RBD-ACE2 binding interface residues for the WT RBD-ACE2 complex (pdb id 6M0J) and Omicron BA1 RBD-ACE2 (pdb id 7WBP).

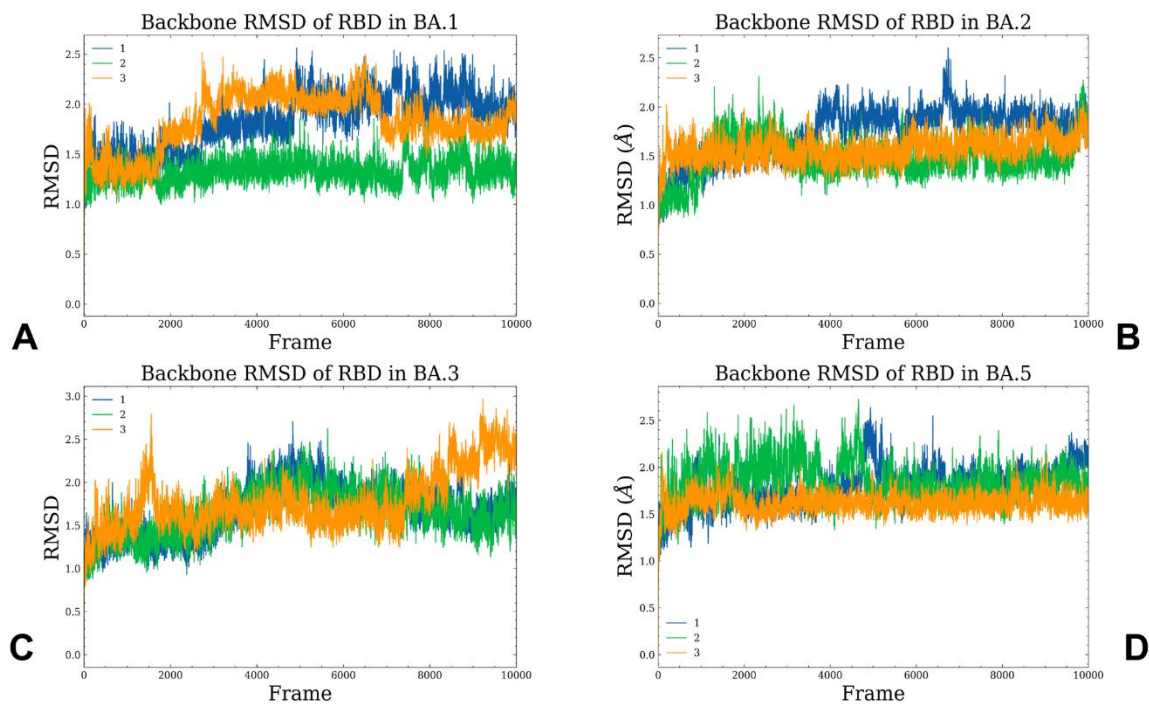

**Figure S2.** Conformational dynamics profiles obtained from all-atom MD simulations of the Omicron RBD BA.1, BA.2, BA.3 and BA.4/BA.5 complexes with hACE2. The RMSD profiles for the RBD residues obtained from 3 microsecond MD simulations of the Omicron RBD BA.1-hACE2 complex, pdb id 7WBP (A), Omicron RBD BA.2-hACE2 complex, pdb id 7XB0 (B), Omicron RBD BA.3-hACE2 complex, pdb id 7XB1 (C) and Omicron RBD BA.4/BA.5-hACE2 complex, pdb id 7XWA (D).

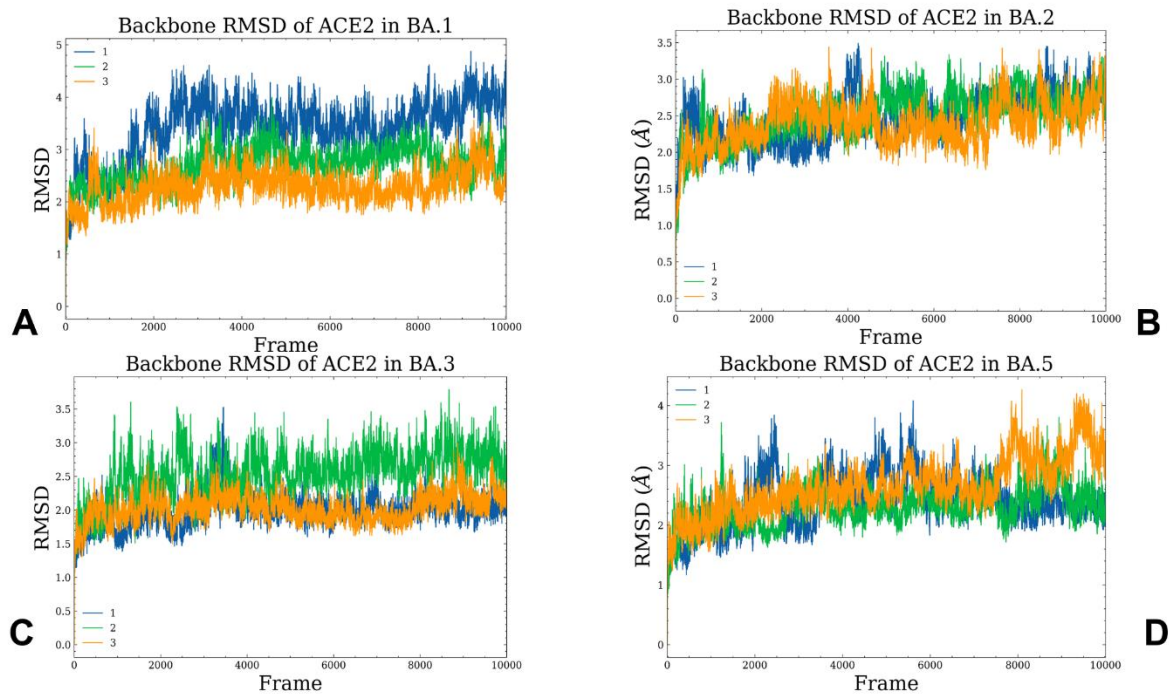

**Figure S3.** Conformational dynamics profiles of the ACE2 residues obtained from MD simulations of the Omicron RBD BA.1, BA.2, BA.3 and BA.4/BA.5 complexes with hACE2. The RMSD profiles for the ACE2 residues obtained from 3 microsecond MD simulations of the Omicron RBD BA.1-hACE2 complex, pdb id 7WBP (A), Omicron RBD BA.2-hACE2 complex, pdb id 7XB0 (B), Omicron RBD BA.3-hACE2 complex, pdb id 7XB1 (C) and Omicron RBD BA.4/BA.5-hACE2 complex, pdb id 7XWA (D).

**Table S1.** Statistical analysis of the intermolecular contact residues in Omicron RBD-hACE2 complexes.\*

| ACE2 | BA.1 RBD                                  | BA.2 RBD                                 | BA.3 RBD                                 | BA.4/5 RBD                            |
|------|-------------------------------------------|------------------------------------------|------------------------------------------|---------------------------------------|
| S19  | A475,<br>G476,N477                        | A475,<br>G476,N477                       | A475,<br>G476,N477                       | A475,<br>G476,N477                    |
| T20  |                                           | N477                                     | A475,N477                                | N477                                  |
| Q24  | A475,<br>G476,N477<br>F486,<br>N487, Y489 | A475,<br>G476,N477<br>F486,N487,<br>Y489 | A475,<br>G476,N477<br>F486,N487,<br>Y489 | A475,<br>G476,N477,<br>N487, Y489     |
| T27  | F456,<br>Y473,<br>A475,Y489               | F456, Y473,<br>A475,Y489                 | F456,<br>Y473,<br>A475,Y489              | F456,Y473,<br>A475,Y489               |
| F28  | N487,Y489                                 | N487,Y489                                | Y489                                     | F456,<br>N487,Y489                    |
| F30  | L455, F456                                | N417, L455,<br>F456                      | L455, F456                               | L455,<br>F456, Q493                   |
| K31  | L455,<br>F456,<br>Y489,R493               | L455,<br>F456,<br>G485,Y489,<br>R493     | L455,<br>F456,<br>Y489,R493              | L455, F456,<br>Y489,Q493              |
| H34  | Y453,<br>L455, R493,<br>S494, Y495        | R403,<br>N417, Y453,<br>L455, R493       | N417,<br>Y453, L455,<br>R493             | N417, Y453,<br>L455, R493             |
| E35  | R493                                      | R493                                     | R493                                     | Q493                                  |
| E37  | H505                                      | H505                                     | H505                                     | H505                                  |
| D38  | Y449,<br>S496, R498,<br>Y501              | Y449, Y495,<br>G496, R498,<br>Y501       | Y449,<br>Y495, R498,<br>Y501             | Y449,<br>Y495,<br>G496, R498,<br>Y501 |
| Y41  | R498,<br>T500, Y501                       | R498,<br>T500, Y501                      | R498,<br>T500, Y501                      | R498, T500,<br>Y501                   |
| Q42  | S446,<br>Y449, R498                       | Y449, R498                               | Y449, R498                               | Y449, R498                            |
| L45  | R498,T500                                 | V445, R498,T500                          | V445,<br>R498,T500                       | V445,<br>R498,T500                    |
| L79  | F486                                      | G485, F486                               | F486                                     | V486                                  |
| M82  | F486                                      | F486                                     | F486                                     | V486                                  |

|      |                                                   |                                                |                                                 |                                   |
|------|---------------------------------------------------|------------------------------------------------|-------------------------------------------------|-----------------------------------|
| Y83  | F486,<br>N487, Y489                               | F486,<br>N487, Y489                            | F486,<br>N487, Y489                             | N487,<br>Y489                     |
| Q325 | V593                                              | Q506                                           | V503, Q506                                      |                                   |
| G326 |                                                   |                                                | T500                                            | T500                              |
| N330 | T500                                              | P499,T500                                      | P499,T500                                       | P499,T500                         |
| G352 |                                                   | Y501,G502                                      | Y501,G502                                       | Y501                              |
| K353 | R403, Y495,<br>S496, T500,<br>Y501, G502,<br>H505 | R403,Y495,<br>T500,Y501,<br>G502,V503,<br>H505 | R403, Y495,<br>T500,Y501,<br>G502,V503,<br>H505 | Y495,<br>T500,Y501,<br>G502, H505 |
| G354 | T500,Y501,<br>G502,V503,<br>H505                  | T500,Y501,<br>G502,V503,<br>H505               | T500,Y501,<br>G502,V503,<br>H505                | Y501,<br>G502,V503,<br>H505       |
| D355 | T500,<br>Y501,G502                                | T500,<br>Y501,G502                             | T500,<br>Y501,G502                              | T500,<br>Y501,G502                |
| R357 |                                                   | T500                                           |                                                 | T500                              |

\*Two residues are defined in contact if any of their heavy atom is within a distance of 5.0 Å

**Table S2.** The Occupancy of the Pairwise Interactions in the Omicron RBD-hACE2 Complexes

|                                 | <b>Interaction</b> | <b>BA.1-ACE2</b> | <b>BA.2-ACE2</b> | <b>BA.3-ACE2</b> | <b>BA.4/BA.5-ACE2</b> |
|---------------------------------|--------------------|------------------|------------------|------------------|-----------------------|
| <b>Salt bridges</b>             | R403-E37           | 65%              | 73%              | 73%              | 62%                   |
|                                 | K440-E329          | 31%              | 54%              | 54%              | 53%                   |
|                                 | R493-E35           | 77%              | 92%              | 99%              |                       |
|                                 | R493-D38           | 26%              | 89%              | 89%              |                       |
|                                 | R498-D38           | 59%              | 95%              | 83%              | 78%                   |
| <b>Hydrophobic Interactions</b> | F456-T27           | 95%              | 96%              | 88%              | 57%                   |
|                                 | Y473-T27           | 92%              | 89%              | 85%              | 72%                   |
|                                 | A475-T27           | 88%              | 93%              | 83%              | 66%                   |
|                                 | F486-F28           | 78%              | 97%              | 90%              | 54%                   |
|                                 | F486/V486-L79      | 85%              | 89%              | 82%              | 57%                   |
|                                 | F486/V486-M82      | 85%              | 96%              | 90%              | 62%                   |
|                                 | F486/V486-Y83      | 90%              | 95%              | 87%              | 53%                   |
|                                 | Y489-F28           | 97%              | 94%              | 95%              | 86%                   |
|                                 | Y489-L79           | 90%              | 95%              | 86%              | 72%                   |
|                                 | Y489-Y83           | 96%              | 82%              | 88%              | 77%                   |
| <b>Hydrogen Bonds</b>           | Y453-H34           | 66%              | 82%              | 92%              | 52%                   |
|                                 | Y449-D38           | 65%              | 82%              | 58%              | 60%                   |
|                                 | A475-S19           | 60%              | 95%              | 85%              | 82%                   |
|                                 | N477-S19           | 58%              | 97%              | 97%              | 69%                   |
|                                 | N487-Q24           | 62%              | 92%              | 92%              | 71%                   |
|                                 | N487-Y83           | 76%              | 92%              | 90%              | 54%                   |
|                                 | Y489-F28           | 82%              | 86%              | 80%              | 68%                   |
|                                 | T500-D355          | 82%              | 77%              | 90%              | 72%                   |
|                                 | T500-Y41           | 72%              | 80%              | 95%              | 54%                   |
|                                 | G502-K353          | 78%              | 84%              | 78%              | 67%                   |
|                                 | Y501-K353          | 86%              | 90%              | 84%              | 77%                   |
|                                 | Q493-K31           |                  |                  |                  | 87%                   |
|                                 | Q493-H34           |                  |                  |                  | 90%                   |
